# Supplementary material for: Digital maturity and its determinants in General Practice: a cross-sectional study in 20 countries
Source: bioRxiv or medRxiv preprint supplement (doi:10.1101/2022.08.23.22278753), 2022-08-24
Supplement: Supplementary file [file media-2.pdf]

## *Supplementary Material*

### **Digital maturity and its determinants in General Practice: a cross-sectional study in 20 countries**

**Fábia Teixeira<sup>1</sup>, Edmond Li <sup>2</sup>, Liliana Laranjo<sup>3,4</sup>, Claire Collins<sup>5</sup>, Greg Irving<sup>6</sup>, Maria Jose Fernandez<sup>7,8</sup>, Josip Car<sup>9,10</sup>, Mehmet Ungan<sup>11</sup>, Davorina Petek<sup>12</sup>, Robert Hoffman<sup>13</sup>, Azeem Majeed<sup>10</sup>, Katarzyna Nessler<sup>14</sup>, Heidrun Lingner<sup>15,16</sup>, Geronimo Jimenez<sup>9,17</sup>, Ara Darzi<sup>2</sup>, Cristina Jácome<sup>1,18</sup>, Ana Luísa Neves<sup>1,2,18</sup>**

<sup>1</sup>Faculty of Medicine of the University of Porto, Porto, Portugal.

<sup>2</sup> Institute of Global Health Innovation, Department of Surgery & Cancer, Faculty of Medicine, Imperial College London, London, United Kingdom.

<sup>3</sup>Westmead Applied Research Centre, Faculty of Medicine and Health, University of Sydney, Sydney, Australia.

<sup>4</sup>Australian Institute of Health Innovation, Macquarie University, Sydney, Australia.

<sup>5</sup>Irish College of General Practitioners, Dublin, Ireland.

<sup>6</sup>Health Research Institute, Edge Hill University, Ormskirk, United Kingdom.

<sup>7</sup>Galicia South Health Research Institute, Vigo, Spain.

<sup>8</sup>Leiro Health Center, Leiro, Spain.

<sup>9</sup>Center for Population Health Sciences, Lee Kong Chian School of Medicine, Nanyang Technological University, Singapore, Singapore.

<sup>10</sup>Department of Primary Care & Public Health, School of Public Health, Imperial College London, London, United Kingdom.

<sup>11</sup>Department of Family Medicine, Ankara University School of Medicine, Ankara, Turkey.

<sup>12</sup>Department of Family Medicine, Faculty of Medicine, University of Ljubljana, Ljubljana, Slovenia.

<sup>13</sup>Department of Family Medicine, Sackler Faculty of Medicine, Tel Aviv University, Tel Aviv, Israel.

<sup>14</sup>Department of Family Medicine, Jagiellonian University Medical College, Krakow, Poland.

<sup>15</sup> Center for Public Health and Healthcare, German Center for Lung Research (DZL), Giessen, Germany.

<sup>16</sup>BREATH Hannover, Hannover Medical School, Hannover, Germany.

<sup>17</sup>Department of Public Health and Primary Care, Leiden University Medical Center, Leiden, Netherlands.

<sup>18</sup>Center for Health Technology and Services Research (CINTESIS.UP), University of Porto, Porto, Portugal

## Abstract

**Background:** The extension to which digital technologies are employed to promote the delivery of high-quality healthcare is known as Digital Maturity. Individuals' and systems' digital maturity are both necessary to ensure a successful, scalable and sustainable digital transformation in healthcare. Digital maturity in primary care has been scarcely evaluated.

**Objectives:** This study assessed the digital maturity - as a whole and in its dimensions - in General Practice and evaluated how participants' demographic characteristics, practice characteristics and features of Electronic Health Records (EHRs) use are associated with digital maturity.

**Methods:** General Practitioners (GPs) across 20 countries completed an online questionnaire between June and September 2020. Demographic data, practice characteristics and features of EHRs use were collected. Digital maturity was evaluated through a framework built upon usage, resources and ability (divided in this study in its collective and individual components), interoperability, general evaluation methods and impact of digital technologies. Each dimension was rated as 1 or 0. The digital maturity score is the sum of the six dimensions and ranges from 0 to 6 (maximum digital maturity). Multivariable linear regression was used to model the total score, while multivariable logistic regression was used to model the probability of meeting each dimension of the score.

**Results:** 1,600 GPs (61% female, 68% Europeans) participated. GPs had a median digital maturity of 4 (P25-P75: 3-5). Positive associations with digital maturity were found for: being male ( $B=0.18$  [95%CI 0.01;0.36]), use of EHRs for longer periods ( $B=0.45$  [95%CI 0.35;0.54]) and higher frequencies of access to EHRs ( $B=0.33$  [95%CI 0.17;0.48]). Practising in a rural setting was negatively associated with digital maturity ( $B=-0.25$  [95%CI -0.43;-0.08]). Usage (90%) was the most acknowledged dimension while interoperability (47%) and use of best practice general evaluation methods (28%) were the least. Shorter durations of EHRs use were negatively associated with all digital maturity dimensions (aOR from 0.09 to 0.77).

**Conclusions:** Our study demonstrated notable factors that impact digital maturity and exposed discrepancies in digital transformation across healthcare settings. It provides a roadmap for policymakers to develop more efficacious interventions to hasten and take the best advantage of digital transformation in General Practice.

Table 3 - Univariate logistic regression models to explain each dimension of the framework: usage, collective resources and ability, individual resources and ability, interoperability, general evaluation methods and impact. Reference – the category used as reference. OR – Odds Ratio; 95%CI - 95% Confidence Interval; GP- General Practitioner, EHRs - Electronic Health Records

|                 | Usage             |         | Collective Resources and Ability |         | Individual Resources and Ability |         | Interoperability |         | General Evaluation Methods |         | Impact            |         |
|-----------------|-------------------|---------|----------------------------------|---------|----------------------------------|---------|------------------|---------|----------------------------|---------|-------------------|---------|
| Characteristics | OR [95% CI]       | P value | OR [95% CI]                      | P value | OR [95% CI]                      | P value | OR [95% CI]      | P value | OR [95% CI]                | P value | OR [95% CI]       | P value |
| Gender          |                   |         |                                  |         |                                  |         |                  |         |                            |         |                   |         |
| Male            | 0.80 [0.55;1.17]  | 0.255   | 0.74 [0.55;0.98]                 | 0.035   | 0.73 [0.56;0.96]                 | 0.024   | 0.78 [0.63;0.98] | 0.031   | 0.93 [0.73;1.19]           | 0.569   | 0.74 [0.59;0.93]  | 0.009   |
| Female          | Reference         |         |                                  |         |                                  |         |                  |         |                            |         |                   |         |
| Age             |                   |         |                                  |         |                                  |         |                  |         |                            |         |                   |         |
| < 30 years      | 0.71 [0.08;6.27]  | 0.761   | 0.16 [0.02;1.27]                 | 0.083   | 0.19 [0.02;1.54]                 | 0.120   | 0.65 [0.21;1.99] | 0.454   | 0.56 [0.15;2.03]           | 0.376   | 2.67 [0.83;8.55]  | 0.099   |
| 30-39 years     | 0.55 [0.07;4.25]  | 0.564   | 0.21 [0.03;1.61]                 | 0.133   | 0.19 [0.02;1.42]                 | 0.105   | 0.69 [0.25;1.95] | 0.486   | 0.82 [0.25;2.62]           | 0.732   | 2.31 [0.76;6.86]  | 0.133   |
| 40-49 years     | -0.81 [0.10;6.36] | 0.838   | 0.44 [0.06;3.43]                 | 0.433   | 0.30 [0.04;2.29]                 | 0.243   | 1.08 [0.38;3.04] | 0.887   | 1.36 [0.43;4.38]           | 0.603   | 3.50 [1.17;10.48] | 0.025   |
| 50-59 years     | 0.64 [0.08;5.05]  | 0.672   | 0.32 [0.04;2.48]                 | 0.275   | 0.25 [0.03;1.94]                 | 0.185   | 1.47 [0.52;4.17] | 0.468   | 1.23 [0.38;3.96]           | 0.734   | 3.17 [1.05;9.52]  | 0.040   |

|                                        |                       |       |                     |        |                      |       |                     |            |                      |       |                      |       |
|----------------------------------------|-----------------------|-------|---------------------|--------|----------------------|-------|---------------------|------------|----------------------|-------|----------------------|-------|
| 60-69 years                            | 0.80<br>[0.10;6.48]   | 0.834 | 0.35<br>[0.05;2.76] | 0.319  | 0.34<br>[0.04;2.66]  | 0.303 | 1.54<br>[0.53;4.42] | 0.420      | 1.38<br>[0.42;4.49]  | 0.598 | 3.13<br>[1.03;9.52]  | 0.044 |
| 70+ years                              | Reference             |       |                     |        |                      |       |                     |            |                      |       |                      |       |
| <b>Country</b>                         |                       |       |                     |        |                      |       |                     |            |                      |       |                      |       |
| European                               | 1.64<br>[1.14;2.37]   | 0.008 | 1.53<br>[1.16;2.02] | 0.003  | 1.31<br>[1.00;1.71]  | 0.050 | 1.55<br>[1.22;1.94] | <0.00<br>1 | 0.76<br>[0.59;0.98]  | 0.031 | 1.21<br>[0.96;1.52]  | 0.105 |
| Non-European                           | Reference             |       |                     |        |                      |       |                     |            |                      |       |                      |       |
| <b>Years of experience as GP</b>       |                       |       |                     |        |                      |       |                     |            |                      |       |                      |       |
| <5 years                               | 0.66<br>[0.41;1.04]   | 0.073 | 0.47<br>[0.33;0.66] | <0.001 | 0.56<br>[0.40;0.78]  | 0.001 | 0.46<br>[0.34;0.62] | <0.00<br>1 | 0.57<br>[0.40;0.80]  | 0.001 | 0.75<br>[0.56;1.01]  | 0.060 |
| 5-10 years                             | 0.94<br>[0.58;1.53]   | 0.940 | 0.88<br>[0.61;1.27] | 0.491  | 0.85<br>[0.60;1.19]  | 0.336 | 0.53<br>[0.40;0.71] | <0.00<br>1 | 0.71<br>[0.51;0.97]  | 0.032 | 0.817<br>[0.61;1.09] | 0.166 |
| 10-15 years                            | 1.04<br>[0.586;1.841] | 0.897 | 0.95<br>[0.62;1.5]  | 0.807  | 0.87<br>[0.59;1.28]  | 0.471 | 0.78<br>[0.56;1.07] | 0.121      | 1.172<br>[0.84;1.65] | 0.357 | 0.87<br>[0.63;1.21]  | 0.414 |
| >15 years                              | Reference             |       |                     |        |                      |       |                     |            |                      |       |                      |       |
| <b>Hours of clinical work per week</b> |                       |       |                     |        |                      |       |                     |            |                      |       |                      |       |
|                                        | 0.99<br>[0.98;1.00]   | 0.065 | 0.99<br>[0.99;1.00] | 0.099  | 0.999<br>[0.99;1.01] | 0.580 | 1.00<br>[0.10;1.01] | 0.505      | 1.00<br>[0.10;1.01]  | 0.307 | 1.00 [1.0;1.01]      | 0.459 |
| <b>Urban Setting of practice</b>       |                       |       |                     |        |                      |       |                     |            |                      |       |                      |       |
| Yes                                    | 0.64<br>[0.37;1.16]   | 0.147 | 1.18<br>[0.82;1.69] | 0.381  | 1.17<br>[0.83;1.65]  | 0.383 | 0.80<br>[0.60;1.08] | 0.149      | 1.09<br>[0.78;1.52]  | 0.620 | 0.93<br>[0.69;1.27]  | 0.659 |
| No                                     | Reference             |       |                     |        |                      |       |                     |            |                      |       |                      |       |

|                                           |                     |        |                     |        |                     |       |                     |        |                      |       |                      |       |
|-------------------------------------------|---------------------|--------|---------------------|--------|---------------------|-------|---------------------|--------|----------------------|-------|----------------------|-------|
| <b>Rural setting of practice</b>          |                     |        |                     |        |                     |       |                     |        |                      |       |                      |       |
| Yes                                       | 1.00<br>[0.69;1.46] | 0.998  | 0.81<br>[0.62;1.07] | 0.142  | 0.77<br>[0.60;1.01] | 0.055 | 1.01<br>[0.81;1.26] | 0.964  | 0.83<br>[0.65;1.07]  | 0.152 | 0.86<br>[0.69;1.08]  | 0.862 |
| No                                        | Reference           |        |                     |        |                     |       |                     |        |                      |       |                      |       |
| <b>Involvement in teaching activities</b> |                     |        |                     |        |                     |       |                     |        |                      |       |                      |       |
| Yes                                       | 1.07<br>[0.73;1.58] | 0.718  | 1.23<br>[0.93;1.64] | 0.144  | 1.08<br>[0.82;1.42] | 0.574 | 1.11<br>[0.88;1.39] | 0.379  | 1.22<br>[0.95;1.58]  | 0.132 | 1.32<br>[1.04;1.66]  | 0.020 |
| No                                        | Reference           |        |                     |        |                     |       |                     |        |                      |       |                      |       |
| <b>Access to EHRs</b>                     |                     |        |                     |        |                     |       |                     |        |                      |       |                      |       |
| Yes                                       | 1.67<br>[0.77;3.62] | 0.194  | 0.80<br>[0.39;1.66] | 0.554  | 0.97<br>[0.51;1.88] | 0.937 | .71<br>[0.41;1.22]  | 0.215  | 0.72<br>[0.41;1.27]  | 0.257 | 0.54<br>[0.29;0.99]  | 0.045 |
| No                                        | Reference           |        |                     |        |                     |       |                     |        |                      |       |                      |       |
| <b>Duration of use of EHRs</b>            |                     |        |                     |        |                     |       |                     |        |                      |       |                      |       |
| Only after COVID-19 outbreak              | 0.07<br>[0.03;0.18] | <0.001 | 0.10<br>[0.04;0.25] | <0.001 | 0.56<br>[0.40;0.78] | 0.001 | 0.46<br>[0.34;0.62] | <0.001 | 0.57<br>[0.40;0.80]  | 0.001 | 0.75<br>[0.56;1.01]  | 0.060 |
| Before COVID-19 outbreak, but <2 years    | 0.10<br>[0.06;0.17] | <0.001 | 0.12<br>[0.08;0.20] | 0.491  | 0.85<br>[0.60;1.19] | 0.336 | 0.53<br>[0.40;0.71] | <0.001 | 0.71<br>[0.51;0.97]  | 0.032 | 0.817<br>[0.61;1.09] | 0.166 |
| [2-5]years                                | 0.23<br>[0.14;0.38] | <0.001 | 0.26<br>[0.18;0.38] | 0.807  | 0.87<br>[0.59;1.28] | 0.471 | 0.78<br>[0.56;1.07] | 0.121  | 1.172<br>[0.84;1.65] | 0.357 | 0.87<br>[0.63;1.21]  | 0.414 |
| [5-10] years                              | 0.58<br>[0.34;0.99] | 0.047  | 0.51<br>[0.36;0.73] |        |                     |       |                     |        |                      |       |                      |       |

|                                    |                     |        |                     |              |                      |              |                     |       |                     |       |                     |       |
|------------------------------------|---------------------|--------|---------------------|--------------|----------------------|--------------|---------------------|-------|---------------------|-------|---------------------|-------|
| > 10 years                         | Reference           |        |                     | <b>0.099</b> | 0.999<br>[0.99;1.01] | 0.580        | 1.00<br>[0.10;1.01] | 0.505 | 1.00<br>[0.10;1.01] | 0.307 | 1.00<br>[1.0;1.01]  | 0.459 |
| <b>Frequency of access to EHRs</b> |                     |        |                     |              |                      |              |                     |       |                     |       |                     |       |
| Less than 1*month                  | 0.07<br>[0.03;0.12] | <0.001 | 0.15<br>[0.06;0.40] | 0.381        | 1.17<br>[0.83;1.65]  | 0.383        | 0.80<br>[0.60;1.08] | 0.149 | 1.09<br>[0.78;1.52] | 0.620 | 0.93<br>[0.69;1.27] | 0.659 |
| At least 1* month                  | 0.12<br>[0.03;0.44] | 0.001  | 0.22<br>[0.06;0.75] |              |                      |              |                     |       |                     |       |                     |       |
| At least 1* week                   | 0.16<br>[0.06;0.41] | <0.001 | 0.29<br>[0.12;0.69] |              |                      |              |                     |       |                     |       |                     |       |
| More than 1* week                  | 0.20<br>[0.11;0.38] | <0.001 | 0.31<br>[0.18;0.54] | 0.142        | 0.77<br>[0.60;1.01]  | <b>0.055</b> | 1.01<br>[0.81;1.26] | 0.964 | 0.83<br>[0.65;1.07] | 0.152 | 0.86<br>[0.69;1.08] | 0.862 |
| Everyday                           | Reference           |        |                     |              |                      |              |                     |       |                     |       |                     |       |
